# Supplementary material
Source: PubMed Central journal article supplement (PMC8382011)
Supplement: NIHMS1700194-supplement-1.pdf [file NIHMS1700194-supplement-1.pdf]

## 5 Supplementary Material

### 5.1 Derivation of why the scaling method preserves the network activity statistics

The membrane voltage of neuron  $i$  is described by

$$\tau_m \frac{dV_i}{dt} = -V_i + RI_i(t), \quad (16)$$

$$\tau_s \frac{dI_i}{dt} = -I_i + \tau_s \sum_j w_{ij} \sum_{t_j^{\text{sp}}} \delta(t - t_j^{\text{sp}} - d), \quad (17)$$

where  $\tau_m$  and  $\tau_s$  are the membrane and synaptic conductances,  $R$  is the membrane resistance,  $I_i$  is the synaptic current,  $w_{ij}$  is the amplitude of the synaptic current in neuron  $i$  due to a spike in neuron  $j$  (synaptic weight),  $\{t_j^{\text{sp}}\}$  is the set of spike times of neuron  $j$ , and  $d$  is transmission delay. In these expressions,  $I_i$  and  $w_{ij}$  are in units of current but they can also be given in units of voltage by absorbing the membrane resistance in the definition of  $w$  (in such case,  $w$  would represent the amplitude of the postsynaptic potential). When  $V_i$  reaches the threshold  $\theta$ , neuron  $i$  is assumed to emit a spike and  $V_i$  is reset to  $V_{\text{reset}}$  for a refractory period  $\tau_{\text{ref}}$ .

Assuming that  $w \ll \theta$ , the synaptic current can be approximated by an average part plus a fluctuating part Brunel (2000)

$$I_i(t) = \mu_i(t) + \sigma_i \sqrt{\tau_m} \eta_i(t), \quad (18)$$

where  $\eta_i(t)$  is a Gaussian white noise with zero mean and unit variance. The average and fluctuating parts can be further split into an internal part, relative to the recurrent connections received by neuron  $i$  from the network, and an external part,

$$\mu_i(t) = \mu_{i,\text{int}}(t) + \mu_{i,\text{ext}}, \quad (19)$$

$$\sigma_i^2(t) = \sigma_{i,\text{int}}^2(t) + \sigma_{i,\text{ext}}^2. \quad (20)$$

Assuming that the average firing rate of neurons from population  $j$  ( $j \in \text{L2/3e, L2/3i, L4e, L4i, } \dots$ ) is given by  $\langle f_j \rangle$  and the average synaptic weight of external connections is  $\langle f_{\text{ext}} \rangle$ , these expressions can be written as

$$\mu_i = \sum_j x_{ij} \langle w_{ij} \rangle \langle f_j \rangle \tau_m + X_{i,\text{ext}} \langle w_{i,\text{ext}} \rangle \langle f_{\text{ext}} \rangle \tau_m, \quad (21)$$

$$\sigma_i^2 = \sum_j x_{ij} \langle w_{ij} \rangle^2 \langle f_j \rangle \tau_m + X_{i,\text{ext}} \langle w_{i,\text{ext}} \rangle^2 \langle f_{\text{ext}} \rangle \tau_m, \quad (22)$$

where  $x_{ij}$  is the average number of connections neuron  $i$  receives from population  $j$ ,  $\langle w_{ij} \rangle$  is the average weight of synapses from neurons in population  $j$  to neuron  $i$ ,  $X_{i,\text{ext}}$  is the number of external synapses received by neuron  $i$ , and  $\langle w_{i,\text{ext}} \rangle$  is the average synaptic weight of external connections to neuron  $i$ .

Assuming that  $x_{ij} = p_{ij} N_j$  and all synapses have the same average weight  $w$  (one could introduce a different weight  $gw$  for inhibitory synapses without loss of generality), these expressions read:

$$\mu_i = \sum_j p_{ij} N_j w \langle f_j \rangle \tau_m + X_{i,\text{ext}} w \langle f_{\text{ext}} \rangle \tau_m, \quad (23)$$

$$\sigma_i^2 = \sum_j p_{ij} N_j w^2 \langle f_j \rangle \tau_m + X_{i,\text{ext}} w^2 \langle f_{\text{ext}} \rangle \tau_m. \quad (24)$$

Applying the scaling transformations,

$$w' = \frac{w}{\sqrt{k}}; \quad (p_{ij} N_j)' = k (p_{ij} N_j); \quad X'_{i,\text{ext}} = k X_{i,\text{ext}}, \quad (25)$$

to eqns. (23 and (24) we get

$$\mu'_i = \sqrt{k} \left( \sum_j p_{ij} N_j w \langle f_j \rangle \tau_m + X_{i,\text{ext}} w \langle f_{\text{ext}} \rangle \tau_m \right) = \sqrt{k} \mu_i, \quad (26)$$

$$\sigma_i'^2 = \sum_j p_{ij} N_j w^2 \langle f_j \rangle \tau_m + X_{i,\text{ext}} w^2 \langle f_{\text{ext}} \rangle \tau_m = \sigma_i^2. \quad (27)$$

So, the variance of the synaptic current is preserved but not the mean. Now add to neuron  $i$  a DC current input given by

$$I_{\text{DC}} = (1 - \sqrt{k}) \left( \sum_j p_{ij} N_j w \langle f_j \rangle \tau_m + X_{i,\text{ext}} w \langle f_{\text{ext}} \rangle \tau_m \right) = (1 - \sqrt{k}) \mu_i. \quad (28)$$

With this, the average part of the synaptic current is also preserved.

## 5.2 Supplementary Tables

| Population Scaling | L2/3e             | L2/3i             | L4e               | L4i               | L5e               | L5i              | L6e               | L6i               |
|--------------------|-------------------|-------------------|-------------------|-------------------|-------------------|------------------|-------------------|-------------------|
| 100%               | 0.90              | 2.80              | 4.39              | 5.70              | 6.80              | 8.22             | 1.14              | 7.60              |
| 80%                | 0.82 (9%)         | 2.81 (0%)         | 4.45 (1%)         | 5.74 (1%)         | 7.10 (4%)         | 8.24 (0%)        | 1.17 (3%)         | 7.64 (1%)         |
| 60%                | 0.85 (6%)         | 2.79 (0%)         | 4.42 (1%)         | 5.74 (1%)         | 6.25 (8%)         | 8.22 (0%)        | 1.09 (4%)         | 7.57 (0%)         |
| 50%                | 0.75 (17%)        | 2.87 (3%)         | 4.57 (4%)         | 5.84 (2%)         | 7.35 (8%)         | 8.31 (1%)        | 1.17 (3%)         | 7.70 (1%)         |
| 40%                | 0.70 (22%)        | 2.95 (5%)         | 4.62 (5%)         | 5.90 (4%)         | 7.90 (16%)        | 8.35 (2%)        | 1.22 (7%)         | 7.79 (3%)         |
| 30%                | <b>0.69 (23%)</b> | 3.06 (9%)         | 4.71 (7%)         | 5.98 (5%)         | 8.34 (23%)        | 8.45 (3%)        | 1.18 (4%)         | 7.92 (4%)         |
| 20%                | 0.78 (13%)        | 2.99 (7%)         | 4.57 (4%)         | 5.97 (5%)         | 6.17 (9%)         | 8.54 (4%)        | 1.06 (7%)         | 7.80 (3%)         |
| 10%                | 0.75 (17%)        | 3.28 (17%)        | 4.76 (8%)         | 6.20 (9%)         | 6.55 (4%)         | <b>8.97 (9%)</b> | 1.10 (4%)         | 8.06 (6%)         |
| 5%                 | <b>0.69 (23%)</b> | 3.88 (39%)        | 4.74 (8%)         | <b>6.33 (11%)</b> | <b>9.66 (42%)</b> | 8.83 (7%)        | 1.09 (4%)         | <b>8.60 (13%)</b> |
| 2%                 | <b>0.69 (23%)</b> | 3.8 (36%)         | 4.15 (5%)         | 5.90 (4%)         | 7.08 (4%)         | 8.70 (6%)        | 1.02 (11%)        | 7.96 (5%)         |
| 1%                 | 0.71 (21%)        | <b>4.08 (46%)</b> | <b>3.71 (15%)</b> | 5.46 (4%)         | 8.33 (23%)        | 8.92 (9%)        | <b>0.93 (18%)</b> | 7.43 (2%)         |
| NEST trial         | 0.86              | -                 | 4.45              | -                 | 7.59              | -                | 1.09              | -                 |

Table S1: Population firing rates (Hz) for rescaled NetPyNE versions of the original PDCM model with Poisson external input. All results calculated from 60 s simulations and all neurons. Relative deviations in relation to the full-scale NetPyNE version ( $|f_{x\%} - f_{100\%}| / f_{100\%}$ ), are shown within parentheses, and their maxima in bold. For comparison, the last row shows the mean firing rates of the NEST implementation (see (Potjans and Diesmann, 2014a) for details).

| Population | L2/3e             | L2/3i            | L4e              | L4i              | L5e               | L5i              | L6e               | L6i              |
|------------|-------------------|------------------|------------------|------------------|-------------------|------------------|-------------------|------------------|
| Scaling    |                   |                  |                  |                  |                   |                  |                   |                  |
| 100%       | 1.02              | 2.89             | 4.32             | 5.60             | 7.02              | 8.20             | 0.90              | 7.46             |
| 80%        | 0.85 (17%)        | 2.83 (2%)        | 4.40 (2%)        | 5.64 (1%)        | 7.55 (8%)         | 8.20 (0%)        | 1.02 (13%)        | 7.49 (1%)        |
| 60%        | 0.89 (13%)        | 2.77 (4%)        | 4.32 (0%)        | 5.59 (0%)        | 6.38 (9%)         | 8.10 (1%)        | 0.94 (4%)         | 7.37 (1%)        |
| 50%        | 0.75 (26%)        | 2.82 (2%)        | 4.46 (3%)        | 5.66 (1%)        | 7.46 (6%)         | 8.16 (0%)        | 1.03 (14%)        | 7.47 (0%)        |
| 40%        | <b>0.66 (35%)</b> | 2.86 (1%)        | 4.49 (4%)        | 5.70 (2%)        | 8.17 (16%)        | 8.16 (0%)        | <b>1.12 (24%)</b> | 7.54 (1%)        |
| 30%        | <b>0.66 (35%)</b> | 2.93 (1%)        | <b>4.53 (5%)</b> | <b>5.71 (2%)</b> | <b>8.46 (21%)</b> | 8.21 (0%)        | 1.05 (17%)        | 7.50 (2%)        |
| 20%        | 0.76 (25%)        | 2.77 (4%)        | 4.29 (1%)        | 5.58 (0%)        | 6.08 (13%)        | <b>8.11 (1%)</b> | 0.89 (1%)         | 7.30 (2%)        |
| 10%        | 0.87 (15%)        | <b>3.06 (6%)</b> | 4.25 (2%)        | 5.46 (2%)        | 6.62 (6%)         | 8.17 (0%)        | 0.80 (11%)        | <b>7.17 (4%)</b> |
| NEST trial | 0.86              | -                | 4.45             | -                | 7.59              | -                | 1.09              | -                |

Table S2: Population firing rates (Hz) for rescaled NetPyNE versions of the original PDCM model with DC current input. All results calculated from 60-seconds simulations and all neurons. Relative deviations in relation to the full-scale NetPyNE version ( $|f_{x\%} - f_{100\%}| / f_{100\%}$ ) are shown within parentheses, and their maxima in bold. For comparison, the last row shows sampled mean firing rates of the NEST implementation (see (Potjans and Diesmann, 2014a) for details).

| Population       | L2/3e                | L2/3i                | L4e                  | L4i                  | L5e                  | L5i                  | L6e                  | L6i                  |
|------------------|----------------------|----------------------|----------------------|----------------------|----------------------|----------------------|----------------------|----------------------|
| Scaling          |                      |                      |                      |                      |                      |                      |                      |                      |
| 100%             | 0.938                | 0.916                | 0.891                | 0.873                | 0.847                | 0.809                | 0.924                | 0.819                |
| 80%              | <b>0.934 (0.45%)</b> | 0.916 (0.06%)        | 0.890 (0.17%)        | 0.873 (0.07%)        | 0.842 (0.63%)        | 0.808 (0.15%)        | 0.927 (0.29%)        | 0.818 (0.19%)        |
| 60%              | <b>0.934 (0.45%)</b> | 0.917 (0.04%)        | 0.891 (0.02%)        | 0.874 (0.12%)        | 0.858 (1.25%)        | 0.813 (0.48%)        | 0.930 (0.63%)        | 0.822 (0.27%)        |
| 50%              | <b>0.934 (0.39%)</b> | 0.917 (0.06%)        | 0.889 (0.19%)        | 0.873 (0.06%)        | 0.838 (1.12%)        | 0.808 (0.24%)        | 0.930 (0.68%)        | 0.816 (0.38%)        |
| 40%              | 0.937 (0.08%)        | 0.914 (0.31%)        | 0.887 (0.44%)        | 0.872 (0.12%)        | 0.828 (2.30%)        | 0.807 (0.36%)        | 0.932 (0.88%)        | 0.816 (0.40%)        |
| 30%              | <b>0.931 (0.72%)</b> | 0.913 (0.37%)        | 0.887 (0.45%)        | 0.873 (0.06%)        | 0.822 (2.95%)        | 0.807 (0.32%)        | 0.931 (0.72%)        | 0.815 (0.60%)        |
| 20%              | 0.936 (0.15%)        | 0.921 (0.50%)        | 0.887 (0.41%)        | 0.871 (0.28%)        | 0.858 (1.22%)        | 0.806 (0.41%)        | 0.929 (0.55%)        | 0.814 (0.64%)        |
| 10%              | 0.937 (0.05%)        | 0.919 (0.31%)        | 0.883 (0.87%)        | 0.869 (0.51%)        | 0.853 (0.62%)        | 0.800 (1.23%)        | <b>0.938 (1.55%)</b> | 0.810 (1.11%)        |
| 5%               | <b>0.926 (1.21%)</b> | 0.899 (1.90%)        | 0.884 (0.82%)        | 0.867 (0.76%)        | <b>0.797 (5.99%)</b> | 0.802 (0.97%)        | 0.934 (1.03%)        | <b>0.803 (1.97%)</b> |
| 2%               | 0.935 (0.32%)        | <b>0.895 (2.34%)</b> | 0.891 (0.03%)        | <b>0.863 (1.21%)</b> | 0.837 (1.23%)        | 0.811 (0.15%)        | 0.932 (0.81%)        | 0.817 (0.24%)        |
| 1%               | <b>0.929 (0.92%)</b> | 0.895 (2.30%)        | <b>0.901 (1.12%)</b> | 0.884 (1.16%)        | 0.823 (2.90%)        | <b>0.785 (2.98%)</b> | 0.932 (0.82%)        | 0.814 (0.66%)        |
| NetPyNE-10 trial | 0.936 ± 0.146        | 0.916 ± 0.106        | 0.890 ± 0.107        | 0.875 ± 0.101        | 0.847 ± 0.107        | 0.809 ± 0.118        | 0.926 ± 0.142        | 0.822 ± 0.125        |

Table S3: Irregularity of single-unit spike trains for rescaled NetPyNE versions of the original PDCM model with Poisson external input. All results calculated from 60-seconds simulations and approximately 1000 neurons per population. Relative deviations in relation to the full-scale NetPyNE version ( $|f_{x\%} - f_{100\%}| / f_{100\%}$ ) are shown within parentheses, and their maxima in bold.

| Population Scaling | L2/3e                | L2/3i                | L4e                  | L4i                  | L5e                  | L5i                  | L6e                  | L6i                  |
|--------------------|----------------------|----------------------|----------------------|----------------------|----------------------|----------------------|----------------------|----------------------|
| 100%               | 0.936                | 0.909                | 0.875                | 0.862                | 0.820                | 0.775                | 0.923                | 0.788                |
| 80%                | 0.934 (0.21%)        | 0.912 (0.33%)        | 0.874 (0.11%)        | 0.858 (0.46%)        | 0.807 (1.59%)        | 0.772 (0.39%)        | 0.921 (0.22%)        | 0.786 (0.25%)        |
| 60%                | 0.935 (0.11%)        | 0.911 (0.22%)        | 0.875 (0.00%)        | 0.858 (0.46%)        | 0.831 (1.34%)        | 0.776 (0.13%)        | 0.922 (0.11%)        | 0.787 (0.13%)        |
| 50%                | 0.933 (0.32%)        | 0.905 (0.44%)        | 0.872 (0.34%)        | <b>0.855 (0.81%)</b> | 0.807 (1.59%)        | 0.773 (0.26%)        | <b>0.920 (0.33%)</b> | 0.785 (0.38%)        |
| 40%                | 0.931 (0.53%)        | 0.910 (0.11%)        | 0.871 (0.46%)        | 0.856 (0.70%)        | 0.792 (3.41%)        | 0.775 (0.00%)        | 0.921 (0.22%)        | 0.783 (0.63%)        |
| 30%                | <b>0.929 (0.75%)</b> | 0.906 (0.33%)        | 0.867 (0.91%)        | 0.857 (0.58%)        | <b>0.784 (4.39%)</b> | 0.777 (0.26%)        | 0.921 (0.22%)        | 0.777 (1.40%)        |
| 20%                | <b>0.929 (0.75%)</b> | 0.908 (0.11%)        | 0.870 (0.57%)        | 0.857 (0.58%)        | 0.829 (1.10%)        | 0.768 (0.90%)        | 0.921 (0.22%)        | 0.782 (0.76%)        |
| 10%                | 0.937 (0.11%)        | <b>0.896 (1.43%)</b> | <b>0.866 (1.03%)</b> | <b>0.855 (0.81%)</b> | 0.817 (0.37%)        | <b>0.766 (1.16%)</b> | <b>0.920 (0.33%)</b> | <b>0.771 (2.16%)</b> |

Table S4: Irregularity of single-unit spike trains for rescaled NetPyNE versions of the original PDCM model with DC current input. All results calculated from 60-seconds simulations and approximately 1000 neurons per population. Relative deviations in relation to the full-scale NetPyNE version ( $|f_{X\%} - f_{100\%}|/f_{100\%}$ ) are shown within parentheses, and their maxima in bold.

| Layer Scaling | L2/3e            | L2/3i            | L4e              | L4i              | L5e              | L5i              | L6e              | L6i              |
|---------------|------------------|------------------|------------------|------------------|------------------|------------------|------------------|------------------|
| 100%          | 2.9              | 1.8              | 3.0              | 1.7              | 4.4              | 1.1              | 1.2              | 1.0              |
| 80%           | 2.3 (21%)        | 1.6 (11%)        | 2.4 (20%)        | 1.4 (18%)        | 4.0 (9%)         | 1.0 (9%)         | 1.2 (0%)         | 0.9 (10%)        |
| 60%           | 2.1 (28%)        | 1.5 (17%)        | 2.2 (27%)        | 1.4 (18%)        | 3.6 (18%)        | <b>0.9 (18%)</b> | 1.2 (0%)         | 0.9 (10%)        |
| 50%           | <b>1.8 (38%)</b> | 1.5 (17%)        | 2.0 (33%)        | 1.3 (24%)        | 4.3 (2%)         | <b>0.9 (18%)</b> | 1.2 (0%)         | 0.9 (10%)        |
| 40%           | <b>1.8 (38%)</b> | 1.6 (11%)        | 2.1 (30%)        | 1.4 (18%)        | 5.0 (14%)        | 1.0 (9%)         | 1.3 (8%)         | <b>0.8 (20%)</b> |
| 30%           | 1.9 (34%)        | 1.7 (6%)         | 2.1 (30%)        | 1.4 (18%)        | 5.9 (34%)        | 1.1 (0%)         | 1.3 (8%)         | 0.9 (10%)        |
| 20%           | 2.0 (31%)        | 1.9 (6%)         | 2.4 (20%)        | 1.7 (0%)         | 5.4 (23%)        | 1.0 (9%)         | 1.4 (17%)        | 0.9 (10%)        |
| 10%           | 2.6 (10%)        | 2.1 (17%)        | 3.1 (3%)         | 1.9 (12%)        | 4.5 (2%)         | 1.1 (0%)         | 1.7 (42%)        | 1.0 (0%)         |
| 5%            | 3.4 (17%)        | <b>2.4 (33%)</b> | 4.1 (37%)        | <b>2.1 (24%)</b> | 5.3 (20%)        | 1.2 (9%)         | <b>1.8 (50%)</b> | 1.1 (10%)        |
| 2%            | 2.5 (14%)        | 1.9 (6%)         | 2.7 (10%)        | 1.8 (6%)         | 2.4 (45%)        | 1.1 (0%)         | 1.4 (17%)        | 1.1 (10%)        |
| 1%            | 1.9 (34%)        | 1.6 (11%)        | <b>1.7 (43%)</b> | 1.4 (18%)        | <b>2.0 (55%)</b> | 1.1 (0%)         | 1.2 (0%)         | 1.0 (0%)         |

Table S5: Synchrony of population spikes for rescaled NetPyNE versions of the original PDCM model with Poisson external input. All results calculated from 60-seconds simulations and approximately 1000 neurons per population. Relative deviations in relation to the full-scale NetPyNE version ( $|f_{X\%} - f_{100\%}|/f_{100\%}$ ) are shown within parentheses, and their maxima in bold.

| Layer   | L2/3e              | L2/3i              | L4e                | L4i               | L5e               | L5i              | L6e               | L6i              |
|---------|--------------------|--------------------|--------------------|-------------------|-------------------|------------------|-------------------|------------------|
| Scaling |                    |                    |                    |                   |                   |                  |                   |                  |
| 100%    | 5.1                | 3.3                | 5.5                | 2.7               | 8.0               | 2.0              | 1.5               | 1.3              |
| 80%     | 3.6 (29%)          | 2.5 (24%)          | 4.1 (25%)          | 2.1 (22%)         | 6.6 (18%)         | 1.5 (25%)        | 1.4 (7%)          | 1.2 (8%)         |
| 60%     | 3.4 (33%)          | 2.5 (24%)          | 3.6 (35%)          | 2.1 (22%)         | 5.6 (30%)         | 1.4 (30%)        | 1.4 (7%)          | 1.1 (15%)        |
| 50%     | 2.6 (49%)          | 2.1 (36%)          | 3.0 (45%)          | 1.8 (33%)         | 5.8 (28%)         | <b>1.2 (40%)</b> | 1.4 (7%)          | 1.0 (23%)        |
| 40%     | 2.4 (53%)          | 2.2 (33%)          | 2.8 (49%)          | 1.8 (33%)         | 6.5 (19%)         | <b>1.2 (40%)</b> | 1.4 (7%)          | 1.0 (23%)        |
| 30%     | 2.5 (51%)          | 2.5 (24%)          | 2.8 (49%)          | 2.0 (26%)         | 7.8 (3%)          | 1.3 (35%)        | 1.5 (0%)          | 1.1 (15%)        |
| 20%     | 3.3 (35%)          | 3.6 (9%)           | 3.9 (29%)          | 2.9 (7%)          | 7.3 (9%)          | 1.3 (35%)        | 1.6 (7%)          | 1.2 (8%)         |
| 10%     | <b>10.7 (110%)</b> | <b>10.3 (212%)</b> | <b>15.6 (184%)</b> | <b>8.5 (215%)</b> | <b>11.4 (43%)</b> | 2.4 (20%)        | <b>3.3 (120%)</b> | <b>2.3 (77%)</b> |

Table S6: Synchrony of population spikes for rescaled NetPyNE versions of the original PDCM model with DC current input. All results calculated from 60-seconds simulations and approximately 1000 neurons per population. Relative deviations in relation to the full-scale NetPyNE version ( $|f_x\% - f_{100\%}|/f_{100\%}$ ) are shown within parentheses, and their maxima in bold.

| Layer   | L2/3e              | L2/3i              | L4e               | L4i                | L5e                | L5i                | L6e                | L6i                |
|---------|--------------------|--------------------|-------------------|--------------------|--------------------|--------------------|--------------------|--------------------|
| Scaling |                    |                    |                   |                    |                    |                    |                    |                    |
| 100%    | 0.036              | 0.053              | 0.056             | 0.057              | 0.057              | 0.058              | 0.039              | 0.057              |
| 80%     | 0.034 (5%)         | 0.054 (1%)         | 0.056 (1%)        | 0.057 (0%)         | 0.057 (0%)         | 0.058 (0%)         | 0.039 (1%)         | 0.057 (0%)         |
| 60%     | 0.035 (3%)         | 0.055 (2%)         | 0.056 (2%)        | 0.057 (1%)         | 0.057 (0%)         | 0.059 (1%)         | 0.039 (1%)         | 0.058 (1%)         |
| 50%     | 0.033 (8%)         | 0.055 (3%)         | 0.057 (2%)        | 0.057 (1%)         | 0.058 (1%)         | 0.059 (2%)         | 0.040 (4%)         | 0.058 (1%)         |
| 40%     | <b>0.032 (12%)</b> | 0.055 (4%)         | 0.057 (2%)        | 0.058 (2%)         | 0.058 (1%)         | 0.060 (3%)         | 0.040 (5%)         | 0.058 (1%)         |
| 30%     | <b>0.032 (12%)</b> | 0.056 (5%)         | 0.057 (3%)        | 0.058 (2%)         | 0.058 (1%)         | 0.060 (4%)         | 0.040 (5%)         | 0.059 (2%)         |
| 20%     | 0.034 (7%)         | 0.056 (6%)         | 0.057 (3%)        | 0.058 (3%)         | 0.058 (2%)         | 0.062 (6%)         | 0.039 (1%)         | 0.059 (3%)         |
| 10%     | 0.034 (7%)         | 0.057 (7%)         | 0.057 (3%)        | 0.059 (5%)         | 0.059 (3%)         | 0.067 (15%)        | 0.040 (4%)         | 0.061 (6%)         |
| 5%      | 0.032 (11%)        | 0.058 (10%)        | 0.058 (4%)        | 0.061 (7%)         | 0.061 (7%)         | 0.071 (22%)        | 0.040 (4%)         | 0.063 (10%)        |
| 2%      | 0.036 (0%)         | 0.060 (12%)        | <b>0.059 (6%)</b> | 0.062 (10%)        | 0.066 (15%)        | 0.079 (36%)        | <b>0.043 (11%)</b> | <b>0.066 (15%)</b> |
| 1%      | <b>0.041 (12%)</b> | <b>0.063 (18%)</b> | 0.060 (0%)        | <b>0.063 (11%)</b> | <b>0.076 (34%)</b> | <b>0.106 (82%)</b> | 0.042 (8%)         | 0.063 (10%)        |

Table S7: Average cross correlation between pairs of neurons per population for rescaled NetPyNE versions of the original PDCM model with Poisson input. All results calculated from 5-seconds simulations and all pair of neurons combination per population. Relative deviations in relation to the full-scale NetPyNE version ( $|f_x\% - f_{100\%}|/f_{100\%}$ ) are shown within parentheses, and their maxima in bold.

| Layer Scaling | L2/3e               | L2/3i              | L4e                | L4i                | L5e                | L5i                 | L6e                | L6i                |
|---------------|---------------------|--------------------|--------------------|--------------------|--------------------|---------------------|--------------------|--------------------|
| 100%          | 0.039               | 0.055              | 0.057              | 0.057              | 0.058              | 0.059               | 0.036              | 0.058              |
| 80%           | 0.035 (9 %)         | 0.055 (0 %)        | 0.057 (0 %)        | 0.057 (0 %)        | 0.058 (0 %)        | 0.059 (1 %)         | 0.038 (4 %)        | 0.058 (0 %)        |
| 60%           | 0.036 (6 %)         | 0.054 (1 %)        | 0.057 (0 %)        | 0.058 (1 %)        | 0.058 (0 %)        | 0.060 (1 %)         | 0.037 (2 %)        | 0.059 (1 %)        |
| 50%           | 0.033 (14 %)        | 0.055 (1 %)        | 0.057 (0 %)        | 0.058 (1 %)        | 0.058 (0 %)        | 0.061 (3 %)         | 0.038 (5 %)        | 0.059 (1 %)        |
| 40%           | 0.032 (17 %)        | 0.055 (0 %)        | 0.057 (0 %)        | 0.058 (1 %)        | 0.058 (1 %)        | 0.061 (3 %)         | <b>0.039 (8 %)</b> | 0.059 (2 %)        |
| 30%           | <b>0.031 (18 %)</b> | 0.055 (0 %)        | 0.057 (0 %)        | 0.058 (1 %)        | 0.059 (2 %)        | 0.062 (5 %)         | 0.038 (5 %)        | 0.060 (3 %)        |
| 20%           | 0.033 (13 %)        | 0.055 (1 %)        | 0.057 (0 %)        | 0.059 (2 %)        | 0.058 (1 %)        | 0.064 (8 %)         | 0.036 (1 %)        | 0.061 (5 %)        |
| 10%           | 0.039 (2 %)         | <b>0.057 (3 %)</b> | <b>0.058 (2 %)</b> | <b>0.060 (5 %)</b> | <b>0.060 (4 %)</b> | <b>0.070 (18 %)</b> | 0.035 (2 %)        | <b>0.063 (9 %)</b> |

Table S8: Average cross correlation between pairs of neurons per population for rescaled NetPyNE versions of the original PDCM model with DC input. All results calculated from 5-seconds simulations and all pair of neurons combination per population. Relative deviations in relation to the full-scale NetPyNE version ( $|f_{X\%} - f_{100\%}| / f_{100\%}$ ) are shown within parentheses, and their maxima in bold.
